# Supplementary material for: Does a Rural-Urban Gradient Affect Arthropod Assemblages in an Arid Ecosystem?
Source: Preprints.org preprint supplement (doi:10.20944/preprints202301.0506.v1), 2023-01-27
Supplement: Supplementary file 3 [file supplementary]

**Supplementary Material**

**Table S1:** List of ground-dwelling beetles and their abundance along the rural-urban gradient in Wadi Hanifa, Riyadh, Saudi Arabia.

| **Family** | **Species** | **Code** | **Rural** | | | | | | **Suburban** | | | | | | **Urban** | | | | | | **Total** |
| --- | --- | --- | --- | --- | --- | --- | --- | --- | --- | --- | --- | --- | --- | --- | --- | --- | --- | --- | --- | --- | --- |
| **WHR1** | **WHR2** | **WHR3** | **WHR4** | **WHR5** | **WHR** | **WHS1** | **WHS2** | **WHS3** | **WHS4** | **WHS5** | **WHS** | **WHU1** | **WHU2** | **WHU3** | **WHU4** | **WHU5** | **WHU** |
| Anthicidae | *Anthelephila caeruleipennis* (La Ferté-Sénectère, 1847) | SP1 | 0 | 0 | 0 | 1 | 0 | 1 | 0 | 0 | 0 | 0 | 0 | 0 | 4 | 34 | 50 | 210 | 32 | 330 | 331 |
| Anthicidae | *Anthelephila* *ionica* (LaFerté-Sénectère, 1849) | SP2 | 0 | 0 | 11 | 10 | 0 | 21 | 0 | 0 | 0 | 0 | 0 | 0 | 0 | 0 | 0 | 2 | 0 | 2 | 23 |
| Anthicidae | *Anthelephila* sp. | SP3 | 0 | 0 | 0 | 0 | 0 | 0 | 0 | 0 | 1 | 0 | 0 | 1 | 0 | 0 | 3 | 0 | 0 | 3 | 4 |
| Anthicidae | *Anthicus* *crinitus* LaFerté-Sénectère, 1849 | SP4 | 1 | 0 | 0 | 5 | 1 | 7 | 0 | 0 | 0 | 0 | 0 | 0 | 11 | 15 | 36 | 9 | 72 | 143 | 150 |
| Anthicidae | *Endomia* *lefebvrei* (LaFerté-Sénectère, 1849) | SP5 | 0 | 0 | 0 | 0 | 0 | 0 | 0 | 0 | 0 | 0 | 0 | 0 | 3 | 3 | 6 | 5 | 3 | 20 | 20 |
| Anthicidae | *Omonadus* *floralis* (Linnaeus, 1758) | SP6 | 0 | 0 | 0 | 0 | 0 | 0 | 1 | 0 | 0 | 0 | 0 | 1 | 0 | 1 | 0 | 3 | 0 | 4 | 5 |
| Carabidae | *Anthia* *duodecimguttata* Bonelli, 1813 | SP7 | 0 | 2 | 1 | 1 | 0 | 4 | 0 | 0 | 0 | 0 | 0 | 0 | 0 | 0 | 0 | 0 | 0 | 0 | 4 |
| Carabidae | *Apristus* *striatipennis* (Lucas, 1846) | SP8 | 0 | 0 | 0 | 0 | 0 | 0 | 0 | 0 | 0 | 0 | 0 | 0 | 0 | 0 | 1 | 0 | 0 | 1 | 1 |
| Carabidae | *Bembidion* *wittmeri* (Basilewsky, 1979) | SP9 | 1 | 0 | 51 | 90 | 8 | 150 | 0 | 0 | 0 | 0 | 0 | 0 | 3 | 0 | 1 | 2 | 32 | 38 | 188 |
| Carabidae | *Calosoma* *olivieri* Dejean, 1831_Sp | SP10 | 0 | 0 | 0 | 2 | 0 | 2 | 0 | 0 | 0 | 0 | 0 | 0 | 0 | 0 | 0 | 0 | 0 | 0 | 2 |
| Carabidae | *Eremolestes* *sulcatus* (Chaudoir, 1876) | SP11 | 0 | 0 | 1 | 1 | 1 | 3 | 0 | 0 | 0 | 0 | 0 | 0 | 0 | 0 | 0 | 0 | 0 | 0 | 3 |
| Carabidae | *Masoreus* *wetterhallii* (Gyllenhal, 1813) | SP12 | 0 | 0 | 0 | 3 | 3 | 6 | 0 | 0 | 0 | 0 | 0 | 0 | 0 | 0 | 0 | 0 | 0 | 0 | 6 |
| Carabidae | *Mesolestes* *quadriguttatus* (Mateu, 1979) | SP13 | 1 | 1 | 0 | 2 | 8 | 12 | 0 | 0 | 0 | 0 | 0 | 0 | 0 | 0 | 0 | 0 | 0 | 0 | 12 |
| Carabidae | *Metadromius* *arabicus* Mateu, 1979 | SP14 | 0 | 0 | 0 | 0 | 0 | 0 | 1 | 0 | 0 | 0 | 0 | 1 | 0 | 0 | 0 | 0 | 0 | 0 | 1 |
| Carabidae | *Microlestes* *discoidalis* (Fairmaire, 1892) | SP15 | 0 | 0 | 0 | 1 | 0 | 1 | 0 | 0 | 0 | 0 | 0 | 0 | 0 | 0 | 0 | 0 | 0 | 0 | 1 |
| Carabidae | *Microlestes* *infuscatus* (Motschulsky, 1859) | SP16 | 0 | 0 | 0 | 0 | 0 | 0 | 0 | 0 | 0 | 0 | 0 | 0 | 0 | 1 | 3 | 1 | 0 | 5 | 5 |
| Carabidae | *Stenolophus* *marginatus* Dejean, 1829 | SP17 | 0 | 0 | 0 | 0 | 1 | 1 | 0 | 0 | 0 | 0 | 0 | 0 | 0 | 0 | 0 | 0 | 0 | 0 | 1 |
| Dermestidae | *Anthrenus* *malkini* Mroczkowski, 1980 | SP19 | 0 | 0 | 0 | 0 | 0 | 0 | 0 | 1 | 1 | 0 | 0 | 2 | 0 | 0 | 0 | 0 | 0 | 0 | 2 |
| Dermestidae | *Attagenus* *lobatus* Rosenhauer, 1856 | SP20 | 0 | 0 | 1 | 0 | 0 | 1 | 0 | 0 | 0 | 0 | 0 | 0 | 0 | 0 | 0 | 0 | 0 | 0 | 1 |
| Dermestidae | *Attagenus* *lynx* (Mulsant et Rey, 1868) | SP21 | 2 | 4 | 2 | 0 | 0 | 8 | 0 | 8 | 0 | 0 | 6 | 14 | 0 | 0 | 0 | 0 | 0 | 0 | 22 |
| Dermestidae | *Phradonoma* *nobile* (Reitter, 1881) | SP22 | 0 | 0 | 0 | 0 | 0 | 0 | 0 | 0 | 2 | 0 | 0 | 2 | 0 | 0 | 0 | 0 | 0 | 0 | 2 |
| Dermestidae | *Thorictus* *hanifahensis* Háva & Abdel-Dayem, 2021 | SP24 | 0 | 0 | 0 | 0 | 0 | 0 | 1 | 0 | 0 | 0 | 0 | 1 | 0 | 0 | 0 | 0 | 0 | 0 | 1 |
| Dermestidae | *Thorictus* *riyadhensis* Háva & Abdel-Dayem, 2021 | SP23 | 0 | 0 | 0 | 0 | 0 | 0 | 0 | 0 | 0 | 1 | 0 | 1 | 0 | 0 | 0 | 0 | 0 | 0 | 1 |
| Elateridae | *Aeoloides* *grisescens* (Germar, 1844) | SP25 | 0 | 0 | 0 | 0 | 0 | 0 | 0 | 0 | 0 | 0 | 0 | 0 | 0 | 1 | 0 | 0 | 1 | 2 | 2 |
| Elateridae | *Craspedostethus* *dilutus* (Erichson, 1840) | SP26 | 0 | 0 | 0 | 0 | 0 | 0 | 1 | 0 | 0 | 1 | 0 | 2 | 0 | 0 | 0 | 0 | 0 | 0 | 2 |
| Elateridae | *Dicronychus* *brancuccii* Platia & Schimmel, 1997 | SP27 | 0 | 0 | 0 | 7 | 1 | 8 | 0 | 0 | 0 | 1 | 1 | 2 | 0 | 0 | 0 | 0 | 0 | 0 | 10 |
| Elateridae | *Dicronychus* *latifae* Al Dhafer & Platia, 2013 | SP28 | 0 | 0 | 0 | 3 | 0 | 3 | 0 | 0 | 0 | 0 | 0 | 0 | 0 | 0 | 0 | 0 | 0 | 0 | 3 |
| Elateridae | *Dicronychus* sp. | SP29 | 0 | 0 | 0 | 1 | 0 | 1 | 0 | 0 | 0 | 0 | 0 | 0 | 0 | 0 | 0 | 0 | 0 | 0 | 1 |
| Elateridae | *Dieronychus* *talhouki* Platia & Schimmel 1997 | SP30 | 0 | 0 | 0 | 14 | 3 | 17 | 1 | 1 | 0 | 0 | 0 | 2 | 0 | 0 | 0 | 0 | 0 | 0 | 19 |
| Elateridae | *Drasterius* *aegyptiacus* Buysson, 1905 | SP31 | 0 | 0 | 0 | 0 | 0 | 0 | 0 | 0 | 0 | 0 | 0 | 0 | 3 | 0 | 16 | 0 | 0 | 19 | 19 |
| Elateridae | *Heteroderes* *gallagheri* Platia & Schimmel, 1997 | SP32 | 0 | 0 | 1 | 1 | 0 | 2 | 0 | 0 | 0 | 0 | 0 | 0 | 0 | 0 | 0 | 0 | 0 | 0 | 2 |
| Elateridae | *Heteroderes* *musculus* (Germar, 1844) | SP33 | 0 | 0 | 1 | 8 | 3 | 12 | 0 | 0 | 1 | 2 | 2 | 5 | 0 | 0 | 0 | 0 | 0 | 0 | 17 |
| Elateridae | *Heteroderes* *omanensis* Platia & Schimmel, 1997 | SP34 | 0 | 0 | 0 | 8 | 0 | 8 | 0 | 0 | 0 | 0 | 0 | 0 | 0 | 0 | 0 | 0 | 0 | 0 | 8 |
| Elateridae | *Heteroderes* *ruteri* Chassain, 1979 | SP35 | 0 | 2 | 17 | 53 | 7 | 79 | 0 | 0 | 1 | 7 | 3 | 11 | 0 | 0 | 0 | 0 | 0 | 0 | 90 |
| Elateridae | *Heteroderes* sp. | SP36 | 0 | 0 | 0 | 3 | 0 | 3 | 0 | 0 | 0 | 0 | 0 | 0 | 0 | 0 | 0 | 0 | 0 | 0 | 3 |
| Glaresidae | *Glaresis* *arabica* Paulian, 1980 | SP52 | 1 | 0 | 0 | 2 | 0 | 3 | 0 | 0 | 0 | 0 | 0 | 0 | 0 | 0 | 0 | 0 | 0 | 0 | 3 |
| Histeridae | *Atholus* *bimaculatus* (Linnaeus, 1758) | SP37 | 0 | 1 | 1 | 16 | 1 | 19 | 0 | 0 | 1 | 1 | 0 | 2 | 0 | 0 | 0 | 0 | 0 | 0 | 21 |
| Histeridae | *Saprinus* sp.1 | SP38 | 0 | 0 | 0 | 0 | 0 | 0 | 0 | 0 | 0 | 0 | 0 | 0 | 0 | 0 | 0 | 1 | 0 | 1 | 1 |
| Histeridae | *Saprinus* sp.2 | SP39 | 0 | 0 | 0 | 1 | 0 | 1 | 0 | 0 | 0 | 0 | 0 | 0 | 0 | 0 | 0 | 0 | 0 | 0 | 1 |
| Histeridae | *Saprinus* sp.3 | SP40 | 0 | 1 | 0 | 4 | 0 | 5 | 0 | 0 | 0 | 0 | 0 | 0 | 0 | 0 | 0 | 0 | 0 | 0 | 5 |
| Histeridae | *Saprinus* sp.4 | SP41 | 0 | 1 | 0 | 0 | 0 | 1 | 0 | 0 | 0 | 0 | 0 | 0 | 0 | 0 | 0 | 0 | 0 | 0 | 1 |
| Histeridae | *Saprinus* sp.5 | SP42 | 1 | 0 | 0 | 0 | 0 | 1 | 0 | 0 | 0 | 0 | 0 | 0 | 0 | 0 | 0 | 0 | 0 | 0 | 1 |
| Histeridae | *Saprinus* sp.6 | SP43 | 0 | 1 | 0 | 1 | 0 | 2 | 0 | 0 | 0 | 0 | 0 | 0 | 0 | 0 | 0 | 0 | 0 | 0 | 2 |
| Histeridae | *Saprinus* sp.7 | SP44 | 0 | 1 | 0 | 1 | 0 | 2 | 0 | 1 | 0 | 0 | 0 | 1 | 0 | 0 | 0 | 0 | 0 | 0 | 3 |
| Scarabaeidae | *Ablaberoides* *abyssinicus* (Brenske, 1902) | SP45 | 0 | 0 | 15 | 0 | 1 | 16 | 0 | 0 | 0 | 0 | 0 | 0 | 0 | 0 | 0 | 0 | 0 | 0 | 16 |
| Scarabaeidae | *Adoretus* *granulifrons* Fairmaire, 1882 | SP46 | 0 | 0 | 0 | 0 | 0 | 0 | 0 | 0 | 0 | 7 | 0 | 7 | 0 | 0 | 0 | 0 | 0 | 0 | 7 |
| Scarabaeidae | *Aphodius* *lividus* Olivier, 1789 | SP47 | 0 | 1 | 0 | 0 | 0 | 1 | 0 | 0 | 0 | 0 | 0 | 0 | 7 | 0 | 0 | 1 | 0 | 8 | 9 |
| Scarabaeidae | *Aphodius* *saoudi* Paulian, 1980 | SP48 | 0 | 1 | 0 | 0 | 0 | 1 | 0 | 0 | 0 | 0 | 0 | 0 | 0 | 0 | 0 | 0 | 0 | 0 | 1 |
| Scarabaeidae | *Aphodius* sp. | SP49 | 0 | 1 | 0 | 3 | 2 | 6 | 0 | 2 | 0 | 0 | 0 | 2 | 0 | 0 | 0 | 0 | 0 | 0 | 8 |
| Scarabaeidae | *Maladera* *insanabilis* (Brenske, 1894) | SP53 | 0 | 0 | 0 | 0 | 0 | 0 | 0 | 0 | 5 | 0 | 0 | 5 | 5 | 13 | 0 | 16 | 1 | 35 | 40 |
| Scarabaeidae | *Onthophagus* *sellatus* Klug, 1845 | SP54 | 0 | 0 | 0 | 0 | 0 | 0 | 0 | 0 | 0 | 0 | 0 | 0 | 0 | 0 | 0 | 2 | 0 | 2 | 2 |
| Scarabaeidae | *Pentodon* *algerinus* (Füessly, 1778) | SP55 | 0 | 0 | 0 | 0 | 0 | 0 | 0 | 0 | 0 | 0 | 0 | 0 | 1 | 0 | 1 | 1 | 0 | 3 | 3 |
| Scarabaeidae | *Phaeadoritus* *iranicus* Machatschke, 1960 | SP56 | 0 | 0 | 0 | 0 | 1 | 1 | 0 | 0 | 0 | 0 | 1 | 1 | 0 | 0 | 0 | 1 | 0 | 1 | 3 |
| Scarabaeidae | *Platytomus* *yadai* (Ochi, Kawahara & Inagaki, 2006) | SP57 | 0 | 0 | 0 | 0 | 0 | 0 | 0 | 0 | 0 | 0 | 0 | 0 | 0 | 0 | 3 | 0 | 0 | 3 | 3 |
| Scarabaeidae | *Rhyssemus* *saudi* Pittion, 1984 | SP58 | 0 | 0 | 2 | 3 | 0 | 5 | 2 | 2 | 1 | 2 | 0 | 7 | 0 | 1 | 4 | 0 | 0 | 5 | 17 |
| Scarabaeidae | *Scarabaeus* *cristatus* (Fabricius, 1775) | SP51 | 0 | 1 | 0 | 0 | 0 | 1 | 0 | 0 | 0 | 0 | 0 | 0 | 0 | 0 | 0 | 0 | 0 | 0 | 1 |
| Scarabaeidae | *Schizonycha* sp. | SP59 | 0 | 0 | 1 | 0 | 0 | 1 | 0 | 0 | 0 | 0 | 0 | 0 | 0 | 0 | 0 | 0 | 0 | 0 | 1 |
| Scarabaeidae | *Sphaerotrochalus* sp. | SP60 | 0 | 2 | 0 | 1 | 0 | 3 | 0 | 0 | 0 | 0 | 0 | 0 | 0 | 0 | 0 | 0 | 0 | 0 | 3 |
| Tenebrionidae | *Adelostoma* *subtile* Reitter, 1900 | SP61 | 1 | 9 | 5 | 5 | 0 | 20 | 1 | 0 | 1 | 0 | 0 | 2 | 0 | 0 | 0 | 0 | 0 | 0 | 22 |
| Tenebrionidae | *Adesmia* *cancellata* Solier, 1835 | SP62 | 3 | 7 | 9 | 8 | 8 | 35 | 44 | 11 | 14 | 21 | 16 | 106 | 1 | 0 | 0 | 0 | 0 | 1 | 142 |
| Tenebrionidae | *Adesmia* *stoeckleini* Koch, 1940 | SP63 | 151 | 2 | 24 | 15 | 15 | 207 | 0 | 0 | 0 | 0 | 5 | 5 | 0 | 0 | 0 | 0 | 0 | 0 | 212 |
| Tenebrionidae | *Akis* *spinosa* (Linnaeus, 1764) | SP64 | 1 | 37 | 5 | 1 | 0 | 44 | 0 | 0 | 0 | 0 | 0 | 0 | 0 | 0 | 0 | 0 | 0 | 0 | 44 |
| Tenebrionidae | *Apentanodes* *arabicus* (Kirchsberg, 877) | SP65 | 0 | 0 | 3 | 0 | 0 | 3 | 0 | 0 | 2 | 1 | 6 | 9 | 0 | 0 | 0 | 0 | 0 | 0 | 12 |
| Tenebrionidae | *Blaps* *kollari* *kollari* Seidlitz, 1896 | SP66 | 0 | 3 | 3 | 2 | 4 | 12 | 0 | 0 | 0 | 0 | 0 | 0 | 0 | 0 | 0 | 0 | 0 | 0 | 12 |
| Tenebrionidae | *Cheirodes* *brevicollis* Wollaston, 1864 | SP67 | 0 | 0 | 1 | 0 | 0 | 1 | 0 | 0 | 1 | 1 | 0 | 2 | 0 | 0 | 0 | 0 | 0 | 0 | 3 |
| Tenebrionidae | *Cheirodes* *sardous* Gené, 1839 | SP68 | 0 | 0 | 0 | 0 | 0 | 0 | 0 | 0 | 0 | 0 | 1 | 1 | 0 | 0 | 0 | 0 | 0 | 0 | 1 |
| Tenebrionidae | *Erodius* *servillei* Solier, 1834 | SP69 | 0 | 0 | 0 | 0 | 0 | 0 | 0 | 3 | 2 | 0 | 1 | 6 | 0 | 1 | 0 | 0 | 0 | 1 | 7 |
| Tenebrionidae | *Gonocephalum* *besnardi* Kaszab, 1982 | SP70 | 0 | 0 | 0 | 0 | 0 | 0 | 0 | 0 | 0 | 0 | 0 | 0 | 1 | 1 | 0 | 0 | 1 | 3 | 3 |
| Tenebrionidae | *Gonocephalum* *patruele* (Erichson, 1843) | SP71 | 0 | 18 | 5 | 5 | 0 | 28 | 0 | 0 | 0 | 0 | 0 | 0 | 0 | 3 | 1 | 2 | 9 | 15 | 43 |
| Tenebrionidae | *Gonocephalum* *prolixum* (Erichson, 1843) | SP72 | 0 | 7 | 25 | 41 | 1 | 74 | 0 | 0 | 0 | 0 | 0 | 0 | 34 | 1 | 4 | 6 | 11 | 56 | 130 |
| Tenebrionidae | *Gonocephalum* *rusticum* (Olivier, 1811) | SP73 | 0 | 0 | 1 | 0 | 0 | 1 | 2 | 0 | 0 | 0 | 0 | 2 | 9 | 6 | 23 | 9 | 22 | 69 | 72 |
| Tenebrionidae | *Gonocephalum* *setulosum* (Fladermann, 1837) | SP74 | 0 | 0 | 0 | 0 | 6 | 6 | 0 | 0 | 0 | 3 | 0 | 3 | 0 | 0 | 1 | 0 | 0 | 1 | 10 |
| Tenebrionidae | *Gonocephalum* *soricinum* (Reiche & Saulcy, 1857) | SP75 | 0 | 0 | 1 | 3 | 2 | 6 | 6 | 2 | 2 | 1 | 0 | 11 | 0 | 0 | 0 | 0 | 0 | 0 | 17 |
| Tenebrionidae | *Mesostena* *puncticollis* Solier, 1835 | SP76 | 10 | 26 | 9 | 25 | 59 | 129 | 94 | 38 | 34 | 45 | 47 | 258 | 0 | 2 | 0 | 1 | 2 | 5 | 392 |
| Tenebrionidae | *Micipsa* *arabica* Kaszab, 1981 | SP77 | 0 | 1 | 0 | 0 | 0 | 1 | 0 | 0 | 0 | 0 | 0 | 0 | 0 | 0 | 0 | 0 | 0 | 0 | 1 |
| Tenebrionidae | *Microdera* *marginata* *evansi* Blair, 1923 | SP78 | 0 | 0 | 0 | 0 | 0 | 0 | 0 | 1 | 0 | 0 | 0 | 1 | 0 | 0 | 0 | 0 | 0 | 0 | 1 |
| Tenebrionidae | *Mycetocharina* *vanharteni* Novák, 2008 | SP79 | 0 | 0 | 0 | 1 | 0 | 1 | 0 | 0 | 0 | 0 | 0 | 0 | 0 | 0 | 0 | 0 | 0 | 0 | 1 |
| Tenebrionidae | *Opatroides* *punctulatus* Brullé, 1832 | SP80 | 0 | 0 | 1 | 1 | 0 | 2 | 0 | 0 | 0 | 0 | 0 | 0 | 0 | 0 | 0 | 4 | 0 | 4 | 6 |
| Tenebrionidae | *Opatroides* *vicinus* (Fairmaire, 1896) | SP81 | 0 | 1 | 1 | 2 | 2 | 6 | 0 | 0 | 0 | 0 | 0 | 0 | 0 | 3 | 0 | 1 | 0 | 4 | 10 |
| Tenebrionidae | *Oxycara* *saudarabica* Kaszab, 1979 | SP82 | 8 | 2 | 4 | 8 | 9 | 31 | 0 | 5 | 3 | 4 | 16 | 28 | 0 | 0 | 0 | 0 | 0 | 0 | 59 |
| Tenebrionidae | *Pimelia* *nazarenoides* Kaszab, 1982 | SP83 | 0 | 0 | 1 | 1 | 0 | 2 | 0 | 1 | 1 | 2 | 3 | 7 | 0 | 0 | 0 | 0 | 0 | 0 | 9 |
| Tenebrionidae | *Pimelia* *thomasi* *thomasi* Blair, 1931 | SP84 | 0 | 0 | 0 | 0 | 0 | 0 | 0 | 2 | 2 | 2 | 0 | 6 | 0 | 0 | 0 | 0 | 0 | 0 | 6 |
| Tenebrionidae | *Platynomus* sp. | SP85 | 0 | 0 | 0 | 0 | 1 | 1 | 0 | 0 | 0 | 0 | 0 | 0 | 0 | 0 | 0 | 0 | 0 | 0 | 1 |
| Tenebrionidae | *Scleropatroides* sp. | SP86 | 0 | 1 | 8 | 8 | 1 | 18 | 0 | 0 | 0 | 0 | 0 | 0 | 0 | 0 | 0 | 0 | 0 | 0 | 18 |
| Tenebrionidae | *Sclerum* *orientalis* (Fabricius, 1775) | SP87 | 0 | 0 | 0 | 0 | 0 | 0 | 0 | 0 | 0 | 0 | 0 | 0 | 3 | 1 | 1 | 0 | 1 | 6 | 6 |
| Tenebrionidae | *Sclerum* *sulcatum* Baudi, 1876 | SP88 | 0 | 0 | 0 | 0 | 0 | 0 | 0 | 1 | 0 | 0 | 1 | 2 | 0 | 0 | 0 | 0 | 0 | 0 | 2 |
| Tenebrionidae | *Sepidium* *tricuspidatum* Fabricius, 1775 | SP89 | 1 | 0 | 0 | 0 | 0 | 1 | 0 | 0 | 0 | 0 | 0 | 0 | 0 | 0 | 0 | 0 | 0 | 0 | 1 |
| Tenebrionidae | *Tentyrina* *deserta* *deserta* Kaszab, 1981 | SP90 | 2 | 9 | 1 | 1 | 0 | 13 | 6 | 3 | 4 | 5 | 9 | 27 | 0 | 0 | 0 | 0 | 0 | 0 | 40 |
| Tenebrionidae | *Tentyrina* *palmeri* (Crotch, 1872) | SP91 | 0 | 0 | 0 | 0 | 0 | 0 | 2 | 2 | 0 | 0 | 0 | 4 | 0 | 0 | 0 | 0 | 0 | 0 | 4 |
| Tenebrionidae | *Thraustocolus* *arabicus* Kaszab, 1979 | SP92 | 1 | 0 | 0 | 0 | 0 | 1 | 0 | 0 | 0 | 0 | 1 | 1 | 0 | 0 | 0 | 0 | 0 | 0 | 2 |
| Tenebrionidae | *Thriptera* *kraatzi* (Haag-Rutenberg, 1876) | SP93 | 2 | 2 | 13 | 19 | 3 | 39 | 0 | 0 | 3 | 0 | 0 | 3 | 0 | 0 | 2 | 4 | 5 | 11 | 53 |
| Tenebrionidae | *Trachyderma* *philistina* Reiche & Saulcy, 1857 | SP94 | 8 | 11 | 23 | 19 | 6 | 67 | 11 | 3 | 2 | 6 | 6 | 28 | 0 | 0 | 0 | 1 | 0 | 1 | 96 |
| Tenebrionidae | *Zophosis* *complanata* Solier, 1834 | SP18 | 0 | 1 | 0 | 1 | 0 | 2 | 0 | 0 | 0 | 0 | 0 | 0 | 0 | 0 | 0 | 0 | 0 | 0 | 2 |
| Tenebrionidae | *Zophosis* *punctata* Brullé , 1832 | SP95 | 0 | 0 | 0 | 0 | 0 | 0 | 76 | 13 | 95 | 28 | 25 | 237 | 0 | 0 | 0 | 0 | 0 | 0 | 237 |
